# Supplementary material for: F4+ ETEC infection and oral immunization with F4 fimbriae elicits an IL-17-dominated immune response
Source: Vet Res. 2015 Oct 21;46:121. doi: 10.1186/s13567-015-0264-2 (PMC4618862; doi:10.1186/s13567-015-0264-2)
Supplement: Supplementary file 1 — 10.1186/s13567-015-0264-2 F4 + ETEC number detected in the faeces after F4 + ETEC infection. Piglets were orally inoculated with either 1010 CFU F4+ ETEC (Pig 4 to 6) in 10 mL PBS or only PBS (Pig 1 to 3) as control at day 0 and 1. Faecal samples were collected from day 0 to 4 and inoculated onto blood agar plates and then the number of F4-specific hemolytic E. coli colonies was determined by dot blotting the colonies on nitrocellulose membranes and detecting F4 fimbriae with an F4ac-specific MAb. [file 13567_2015_264_MOESM1_ESM.xls]

## Sheet: Add file 1
	Mean F4+ ETEC Number (/g faeces)
		Pig 1	Pig 2	Pig 3	Pig 4	Pig 5	Pig 6
	Day 4	0	20	0	3 × 105	4 × 106	2 × 104
	Day 3	0	0	0	3.4 × 107	1.6 × 105	1.7 × 105
	Day 2	0	0	0	5.5 × 107	3.2 × 107	1 × 107
	Day 1	0	0	0	3 × 106	5.7 × 106	2.2 × 106
	Day 0	0	10	0	0	0	0
